# Supplementary material for: A glutaredoxin domain fused to the radical-generating subunit of ribonucleotide reductase (RNR) functions as an efficient RNR reductant
Source: PubMed Central journal article supplement (PMC6187632; doi:10.1074/jbc.ra118.004991), 2018-08-30
Supplement: supp_RA118.004991_JBC-2018-004991R1-Supporting_Information_to_be_published_online.pdf [file supp_RA118.004991_JBC-2018-004991R1-Supporting_Information_to_be_published_online.pdf]

## SUPPORTING INFORMATION

**A glutaredoxin domain fused to the radical-generating subunit of ribonucleotide reductase (RNR) functions as an efficient RNR reductant**Inna Rozman Grinberg<sup>1</sup>, Daniel Lundin<sup>1</sup>, Margareta Sahlin<sup>1</sup>, Mikael Crona<sup>1,2</sup>, Gustav Berggren<sup>3</sup>, Anders Hofer<sup>4</sup>, Britt-Marie Sjöberg<sup>1\*</sup>

From the <sup>1</sup>Department of Biochemistry and Biophysics, Stockholm University, Sweden; <sup>2</sup>Swedish Orphan Biovitrum AB, Stockholm, Sweden; <sup>3</sup>Department of Chemistry, Uppsala University, Uppsala, Sweden; <sup>4</sup>Department of Medical Biochemistry and Biophysics, Umeå University, Umeå, Sweden.

**Table S1. RNR proteins with a fused glutaredoxin domain.** Presence of ATP-cone is indicated. RefSeq data from March 16, 2018.

| Protein composition            | Taxon                                | RNR class | RNR subclass | RefSeq accnos                                                                                                                                       |
|--------------------------------|--------------------------------------|-----------|--------------|-----------------------------------------------------------------------------------------------------------------------------------------------------|
| ATP-cone:<br>Glutaredoxin:NrdA | Cafeteria roenbergensis virus BV-PW1 | NrdA      | NrdAe        | YP_003970087.1,<br>YP_003970181.1                                                                                                                   |
| ATP-cone:<br>Glutaredoxin:NrdA | Chrysochromulina ericina virus       | NrdA      | NrdAe        | YP_009173474.1                                                                                                                                      |
| ATP-cone:<br>Glutaredoxin:NrdB | Facklamia ignava                     | NrdB      | NrdBi        | WP_006702003.1,<br>WP_101954394.1                                                                                                                   |
| Glutaredoxin:NrdA              | Streptococcus pneumoniae             | NrdA      | NrdE         | WP_078376953.1                                                                                                                                      |
| Glutaredoxin:NrdA              | Cyanophage S-TIM5                    | NrdA      | NrdAi        | YP_007006137.1                                                                                                                                      |
| Glutaredoxin:NrdA              | Deftia phage phiW-14                 | NrdA      | NrdAk        | YP_003358882.1                                                                                                                                      |
| Glutaredoxin:NrdB              | Allofrancisella guangzhouensis       | NrdB      | NrdBk        | WP_039124745.1                                                                                                                                      |
| Glutaredoxin:NrdB              | Francisella haliotida                | NrdB      | NrdBk        | WP_088772808.1                                                                                                                                      |
| Glutaredoxin:NrdB              | Francisella hispaniensis             | NrdB      | NrdBk        | WP_066046290.1                                                                                                                                      |
| Glutaredoxin:NrdB              | Francisella noatunensis              | NrdB      | NrdBk        | WP_014715631.1                                                                                                                                      |
| Glutaredoxin:NrdB              | Francisella persica                  | NrdB      | NrdBk        | WP_064461048.1                                                                                                                                      |
| Glutaredoxin:NrdB              | Francisella philomiragia             | NrdB      | NrdBk        | WP_012280920.1,<br>WP_035735545.1,<br>WP_042523441.1,<br>WP_044526306.1                                                                             |
| Glutaredoxin:NrdB              | Francisella sp. CA97-1460            | NrdB      | NrdBk        | WP_071664413.1                                                                                                                                      |
| Glutaredoxin:NrdB              | Francisella sp. FSC1006              | NrdB      | NrdBk        | WP_040007580.1                                                                                                                                      |
| Glutaredoxin:NrdB              | Francisella sp. MA067296             | NrdB      | NrdBk        | WP_071629022.1                                                                                                                                      |
| Glutaredoxin:NrdB              | Francisella sp. TX076608             | NrdB      | NrdBk        | WP_071514393.1                                                                                                                                      |
| Glutaredoxin:NrdB              | Francisella sp. TX077308             | NrdB      | NrdBk        | WP_041263735.1                                                                                                                                      |
| Glutaredoxin:NrdB              | Francisella sp. TX077310             | NrdB      | NrdBk        | WP_072712347.1                                                                                                                                      |
| Glutaredoxin:NrdB              | Francisella sp. W12-1067             | NrdB      | NrdBk        | WP_035718892.1                                                                                                                                      |
| Glutaredoxin:NrdB              | Francisella tularensis               | NrdB      | NrdBk        | WP_003015818.1,<br>WP_003018891.1,<br>WP_003023235.1,<br>WP_003026158.1,<br>WP_003033975.1,<br>WP_003036631.1,<br>WP_014548387.1,<br>WP_025329333.1 |
| Glutaredoxin:NrdB              | Francisella                          | NrdB      | NrdBk        | WP_004287627.1                                                                                                                                      |

**Supporting information: Glutaredoxin and ATP-cone fusions to ribonucleotide reductase**

|                   |                                    |      |       |                |
|-------------------|------------------------------------|------|-------|----------------|
| Glutaredoxin:NrdB | Ectocarpus siliculosus virus 1     | NrdB | NrdBe | NP_077613.1    |
| Glutaredoxin:NrdB | Caulobacter virus Karma            | NrdB | NrdBk | YP_006989492.1 |
| Glutaredoxin:NrdB | Caulobacter virus Magneto          | NrdB | NrdBk | YP_006988790.1 |
| Glutaredoxin:NrdB | Caulobacter virus phiCbK           | NrdB | NrdBk | YP_006988007.1 |
| Glutaredoxin:NrdB | Caulobacter virus Rogue            | NrdB | NrdBk | YP_006989137.1 |
| Glutaredoxin:NrdB | Caulobacter virus Swift            | NrdB | NrdBk | YP_006989840.1 |
| Glutaredoxin:NrdB | Bathycoccus sp. RCC1105 virus BpV1 | NrdB | NrdBe | YP_004061574.1 |
| Glutaredoxin:NrdB | Micromonas sp. RCC1109 virus MpV1  | NrdB | NrdBe | YP_004062038.1 |
| Glutaredoxin:NrdB | Ostreococcus lucimarinus virus 1   | NrdB | NrdBe | YP_004061759.1 |
| Glutaredoxin:NrdB | Ostreococcus lucimarinus virus 2   | NrdB | NrdBe | YP_009172647.1 |
| Glutaredoxin:NrdB | Ostreococcus mediterraneus virus 1 | NrdB | NrdBe | YP_009172920.1 |
| Glutaredoxin:NrdB | Ostreococcus tauri virus OtV5      | NrdB | NrdBe | YP_001648250.2 |
| Glutaredoxin:NrdB | Caulobacter phage CcrColossus      | NrdB | NrdBk | YP_006988376.1 |
| Glutaredoxin:NrdB | Micromonas pusilla virus 12T       | NrdB | NrdBe | YP_007676142.1 |
| Glutaredoxin:NrdB | Ostreococcus tauri virus 1         | NrdB | NrdBe | YP_003212974.1 |
| Glutaredoxin:NrdB | Ostreococcus tauri virus 2         | NrdB | NrdBe | YP_004063573.1 |
| Glutaredoxin:NrdB | Pseudoalteromonas phage H101       | NrdB | NrdBk | YP_009225573.1 |
| Glutaredoxin:NrdB | Shewanella sp. phage 1/4           | NrdB | NrdBg | YP_009100336.1 |
| Glutaredoxin:NrdB | Vibrio phage eugene 12A10          | NrdB | NrdBg | YP_009223038.1 |
| Glutaredoxin:NrdB | Vibrio phage helene 12B3           | NrdB | NrdBg | YP_007877328.1 |
| Glutaredoxin:NrdB | Vibrio phage ICP1                  | NrdB | NrdBg | YP_004251147.1 |
| Glutaredoxin:NrdB | Vibrio phage PWH3a-P1              | NrdB | NrdBg | YP_007675959.1 |
| Glutaredoxin:NrdB | Vibrio phage qdvp001               | NrdB | NrdBk | YP_009222074.1 |
| Glutaredoxin:NrdD | Lachnospiraceae bacterium TWA4     | NrdD | NrdDd | WP_082039398.1 |
| Glutaredoxin:NrdJ | Labrenzia aggregata                | NrdJ | NrdJm | WP_082444658.1 |

**Supporting information: Glutaredoxin and ATP-cone fusions to ribonucleotide reductase**

**Table S2. Presence of glutathione biosynthesis and glutathione reductase genes in *Facklamia* spp.** A minus sign denotes that no similar protein sequence was identified by Blast.

| Gene                                       | <i>F. ignava</i>                                                                                                                                                                             | <i>F. sourekii</i>                             | <i>F. miroungae</i>                                                      | <i>F. hominis</i>                                                                                                                                                                                                                                                          | <i>F. sp.</i><br>HMSC062C11                                                                  | <i>F. languida</i>                                                                           |
|--------------------------------------------|----------------------------------------------------------------------------------------------------------------------------------------------------------------------------------------------|------------------------------------------------|--------------------------------------------------------------------------|----------------------------------------------------------------------------------------------------------------------------------------------------------------------------------------------------------------------------------------------------------------------------|----------------------------------------------------------------------------------------------|----------------------------------------------------------------------------------------------|
| <i>gshA</i><br>( <i>E. coli</i><br>K12)    | <a href="#">EKB58368</a><br>(bifunctional)<br><a href="#">WP_083857132</a><br>(bifunctional)<br><a href="#">WP_101953697</a><br>(bifunctional)<br><a href="#">PKY90772</a><br>(bifunctional) | <a href="#">WP_028119450</a><br>(bifunctional) | <a href="#">SDG21584</a><br>(only 382 aa)                                | <a href="#">WP_006908210</a><br>(bifunctional)<br><a href="#">WP_101975023</a><br>(bifunctional)<br><a href="#">PKY93223</a><br>(bifunctional)<br><a href="#">WP_016648844</a><br>(bifunctional)<br><a href="#">EPH07821</a><br>(bifunctional)                             | <a href="#">WP_070608971</a><br>(bifunctional)<br><a href="#">OFL65675</a><br>(bifunctional) | <a href="#">WP_006308547</a><br>(bifunctional)<br><a href="#">EHR37891</a><br>(bifunctional) |
| <i>gshB</i><br>( <i>E. coli</i><br>K12)    | -                                                                                                                                                                                            | -                                              | -                                                                        | -                                                                                                                                                                                                                                                                          | -                                                                                            | -                                                                                            |
| <i>gshF</i><br>( <i>L. monocytogenes</i> ) | <a href="#">EKB58368</a><br>(bifunctional)<br><a href="#">WP_083857132</a><br>(bifunctional)<br><a href="#">WP_101953697</a><br>(bifunctional)<br><a href="#">PKY90772</a><br>(bifunctional) | <a href="#">WP_028119450</a><br>(bifunctional) | <a href="#">SDG21584</a> +<br><a href="#">SDG21622</a><br>(382 + 348 aa) | <a href="#">WP_006908210</a><br>(bifunctional)<br><a href="#">WP_101975023</a><br>(bifunctional)<br><a href="#">PKY93223</a><br>(bifunctional)<br><a href="#">WP_016648844</a><br>(bifunctional)<br><a href="#">EPH07821</a><br>(bifunctional)<br><a href="#">EKB54699</a> | <a href="#">WP_070608971</a><br>(bifunctional)<br><a href="#">OFL65675</a><br>(bifunctional) | <a href="#">WP_006308547</a><br>(bifunctional)<br><a href="#">EHR37891</a><br>(bifunctional) |
| <i>gor</i>                                 | -                                                                                                                                                                                            | <a href="#">WP_028119450</a><br>(bifunctional) | -                                                                        | -                                                                                                                                                                                                                                                                          | -                                                                                            | -                                                                                            |

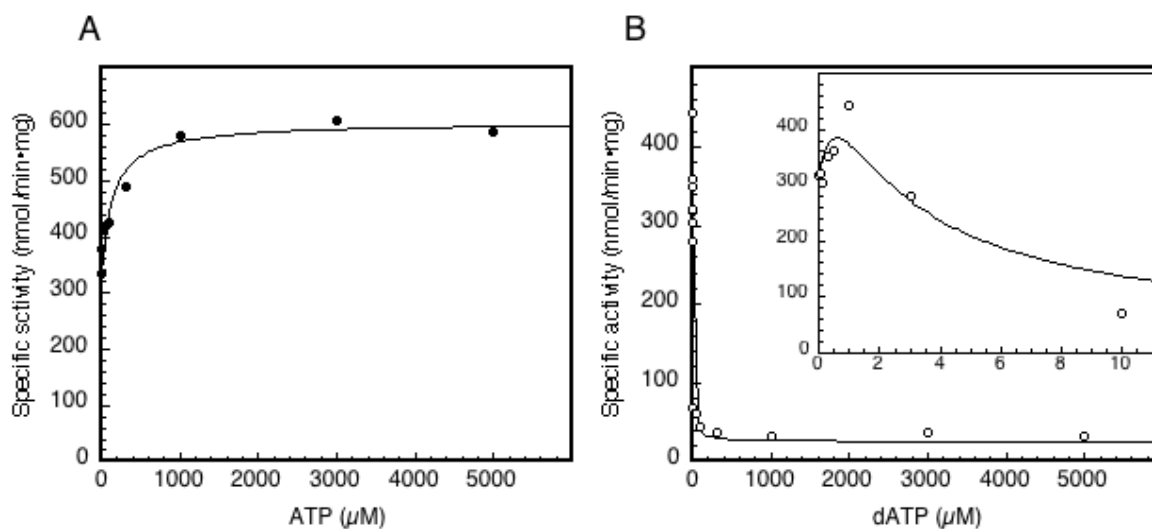

**Figure S1. Enzyme activity of *F. ignava* RNR in presence of ATP or dATP.** The NrdA protein used was before HIC chromatography and has an intrinsic activity of approximately 300 nmol/min•mg. A) ATP titrations showing an apparent  $K_L$  of 150  $\mu$ M. B) dATP titrations; the *inset* shows that dATP promotes enzyme activity when binding with high affinity to the specificity site in NrdA and inhibits the enzyme activity with binding to the ATP-cone in NrdB at dATP concentrations above 2  $\mu$ M. Two independent binding sites for dATP were evaluated according to the equation:  $v = v_{max1} \times [dATP] / (K_{L1} + [dATP]) + v_{max2} \times [dATP] / (K_{L2} + [dATP])$ .

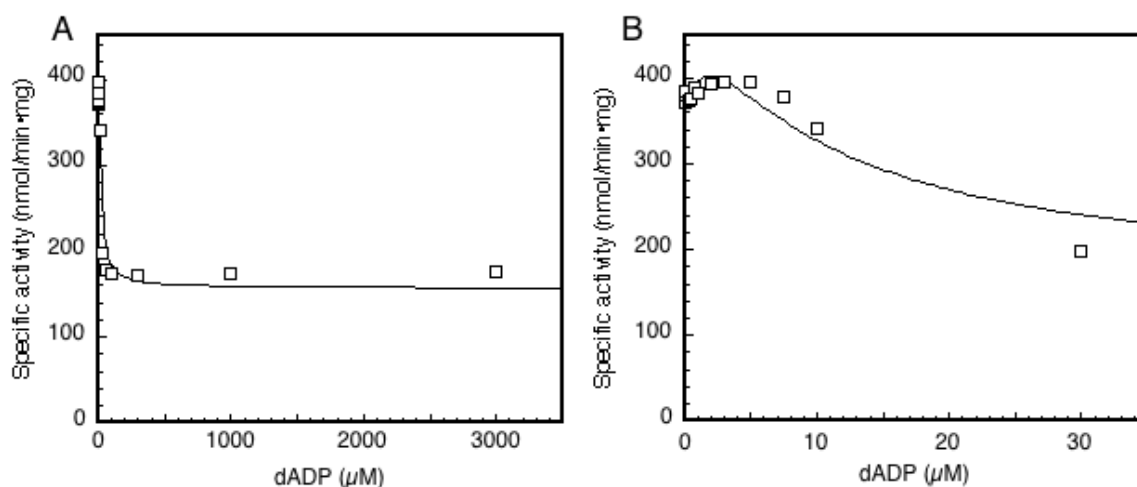

**Figure S2. dADP titration of *F. ignava* RNR.** The NrdA protein used was before HIC chromatography and has an intrinsic activity of approximately 300 nmol/min•mg. A) Full scale of measurements, and B) blow-up of the lower concentrations of dADP highlighting that enzyme activity is inhibited above 5  $\mu$ M.

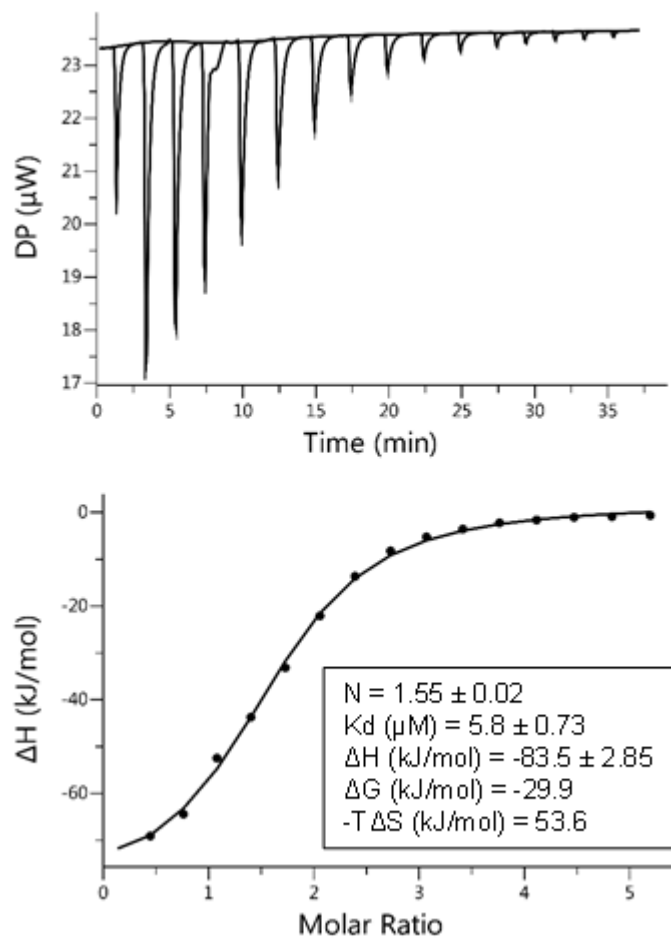

**Figure S3. dADP binding to *F. ignava* NrdB.** ITC was performed as described in Experimental Procedures in a buffer containing 25 mM Hepes at pH 7.6, 150 mM NaCl, 10% glycerol, 5 mM  $\text{Mg}(\text{CH}_3\text{CO}_2)_2$  at 25°C. Cell and syringe contained 30  $\mu\text{M}$  NrdB and 750  $\mu\text{M}$  dADP respectively.

Supporting information: *Glutaredoxin and ATP-cone fusions to ribonucleotide reductase*

```

FiNrdB MTQVQVYSKKVCPWCTRLKDWMDKNNIDYEEIDIEVHPEAREYLHSLGLKTVPQVFIDGVH 61
LbNrdB -----
          ↓
FiNrdB RPHEPLYSNLLHYIHGTSKIPQHVTKRNGDRVDFDPTKIEIAIQK-----NNETHE 113
LbNrdB -----MSSQEIKKIIRDYSTAPFVLEKITNAIANAMAALGHGSEQDAK 44
          *:  ::  **:  .  .  *   **  **  :*   .::  :

FiNrdB LNDMEINTVTQKVVEKIDIDPIHVEEIQDLVETELMLQSFPRITAKAYILYRAEQTKARQR 173
LbNrdB LISMQVYESLLNKEQSEYIPTVEQVQDMVEDKLMSEFHDVAKAYIIRNKRALELRKT 104
          *  .*:  :  *:  .   **::**:*  :**  ..*  .*****:*  ::  *:

FiNrdB DIFKPRKNLKPYEYPELESYKEAIQHSYWLHTEYNYTSDIQDYKINVEPHERTAIRNAML 233
LbNrdB NIFEKRINLKPYEYPELNEYVAAIRHSYWIHTEFNFTSDIQDFKTGLSEVERSAIKNTML 164
          :**  *  *****:.*  **::**:*  :**:*  :**:*  :**:*  :**:*

FiNrdB AISQVEVSVKTFWAKLYDRLPKPELANVGMTFAESEVRHSDAYSHLLELLGLNEIFEEIE 293
LbNrdB AISQIEVAVKTFWGDVHRLPKPEIAAVGATFAESEVRHHDAYSHLLEILGLNEEFKELK 224
          ***:*  :*****  .::  .*****:*  **  *****  *****:*  *****  *:*  :

FiNrdB QIPALNQRVDYLNLSHIKYSQTGSNRDYTISILLFSAFIEHISLFSQFLIIMAFNKQKNLF 353
LbNrdB KKPVIMKRVHYLETSLKHAKSDDREYTESILLFALFIEHVSLSFSQFLIIMAFNKHKNML 284
          :  *  .:  :**.*  :  :*  :::  .:  :**  *****  :  *****  :*****  :*****  :

FiNrdB SGISNVIEATSKEEQHGFEGIDLINTIKAENPDWFDDELKEEITYTLVKQAYESEKDVLD 413
LbNrdB KGISNAVEATSKEEQIHGDFGVDIINI IKKENPEWFDEEHNLIKEMCLNSFEAESKVVD 344
          .*****  .:*****  :**:*  :**:*  **  ***:*  :**:*  :  *  :  :::  :*  .:*  :

FiNrdB WIYEDGEIDFMPTQTVLEFIKNRLNNSLEAIGLERIFETDLAEVEKTLWFDEEIVSTKHV 473
LbNrdB WIFEKGEFLPKAVINEFLKNRFNKSLEAIGLEKLFIDEALLQETEFWDFDEIIGTKHG 404
          **:*  .**:*  :**:*  .  .:  **:*  :**:*  :*****  :**:*  *  *  :::  *  ***:*  :***

FiNrdB DFFAKRSVNYTKRSQSMTADDLF 496
LbNrdB DFFVKRSINYSKRTQSITSDDL 427
          ***  .***  :**:*  :**:*  :**:*  :**:*
    
```

**Figure S4. BLAST alignment of NrdB sequences from *F. ignava* and *L. blandensis*.** Highlighted domains are Grx corresponding to pfam00462 (yellow) and ATP-cone corresponding to pfam03477 (green). The conserved redox-active cysteines in the Grx domain are indicated in red, and the starts of *F. ignava* NrdBΔGrx and NrdBΔ169 are indicated with red arrows. Residues involved in the binding of the two dATP molecules in *L. blandensis* NrdB (1) are indicated in blue for one dATP molecule and red for the other dATP molecule. The ATP-cone domains in *F. ignava* NrdB and *L. blandensis* NrdB have a sequence identity of 28%, and the NrdB cores (covering residues 170-496 in *F. ignava* NrdB and 101- 427 in *L. blandensis* NrdB) have a sequence identity of 61%. Alignments were made using Clustal O at the UniProt server (2).



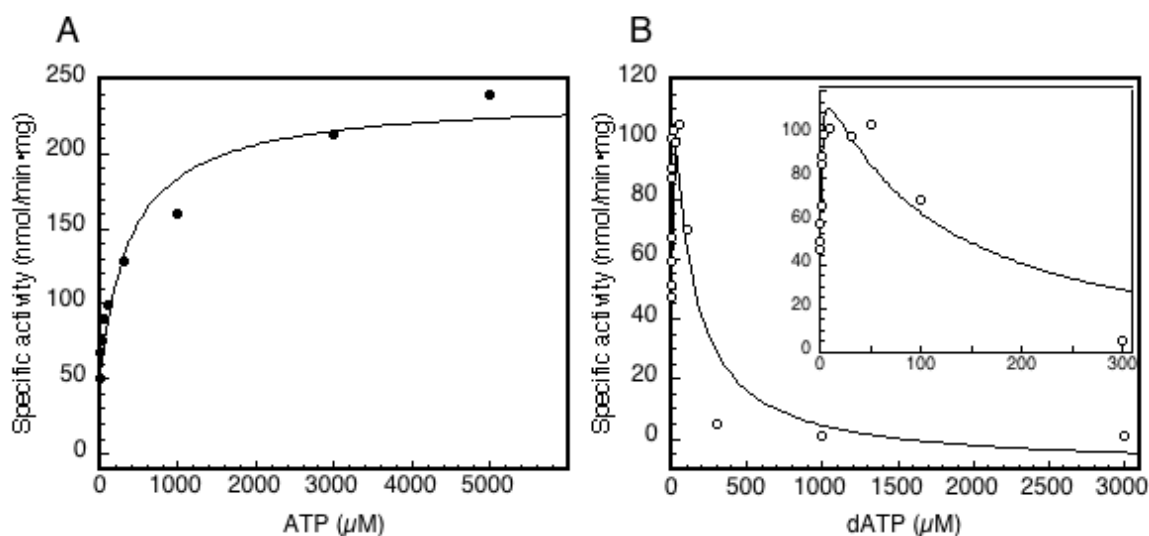

**Figure S6. Enzyme activity in heterologous mixtures of *F. ignava* NrdA and *L. blandensis* NrdB.** Reduction of CDP as a function of A) ATP concentration giving a  $K_L$  of 400  $\mu\text{M}$ , and B) dATP concentration giving a  $K_i$  of 100  $\mu\text{M}$  for the ATP-cone in *L. blandensis* NrdB (Inset: lower dATP concentrations highlighting the  $K_L$  of 1  $\mu\text{M}$  for the specificity site on *F. ignava* NrdA). Two independent binding sites for dATP were evaluated according to the equation:  $v = v_{max1} \times [\text{dATP}] / (K_{L1} + [\text{dATP}]) + v_{max2} \times [\text{dATP}] / (K_{L2} + [\text{dATP}])$ .

## REFERENCES

1. Rozman Grinberg, I., Lundin, D., Hasan, M., Crona, M., Jonna, V. R., Loderer, C., Sahlin, M., Markova, N., Borovok, I., Berggren, G., Hofer, A., Logan, D. T., and Sjöberg, B. M. (2018) Novel ATP-cone-driven allosteric regulation of ribonucleotide reductase via the radical-generating subunit. *Elife* 7, e31529
2. The UniProt, C. (2017) UniProt: the universal protein knowledgebase. *Nucleic Acids Res* 45, D158-D169
